# 1 Informatics investigations into anti-thyroid drug induced 2 agranulocytosis associated with multiple HLA-B alleles

3 Kerry A Ramsbottom<sup>1</sup>, Daniel F Carr<sup>2</sup>, Daniel J Rigden<sup>1</sup> and Andrew R Jones<sup>1\*</sup>

4 <sup>1</sup> Institute of Integrative Biology, University of Liverpool, Liverpool UK

5 <sup>2</sup> Institute of Translational Medicine, University of Liverpool, Liverpool UK

6 \* = corresponding author

## 7 **Abstract**

8 Adverse drug reactions have been linked with HLA alleles in different studies. These HLA proteins  
9 play an essential role in the adaptive immune response for the presentation of self and non-self  
10 peptides. Anti-thyroid drugs methimazole and propylthiouracil have been associated with drug  
11 induced agranulocytosis (severe lower white blood cell count) in patients with B\*27:05, B\*38:02 and  
12 DRB1\*08:03 alleles in different populations: Taiwanese, Vietnamese, Han Chinese and Caucasian.  
13 In this study, informatics methods were used to investigate if any sequence or structural similarities  
14 exist between the two associated HLA-B alleles, compared with a set of “control” alleles assumed  
15 not be associated, which could help explain the molecular basis of the adverse drug reaction. We  
16 demonstrated using MHC Motif Viewer and MHCcluster that the two alleles do not have a  
17 propensity to bind similar peptides, and thus at a gross level the structure of the antigen  
18 presentation region of the two alleles are not similar. We also performed multiple sequence  
19 alignment to identify polymorphisms shared by the risk but not by the control alleles and molecular  
20 docking to compare the predicted binding positions of the drug-allele combinations.

21 Two residues, Cys67 and Thr80, were identified from the multiple sequence alignments to be unique  
22 to these risk alleles alone. The molecular docking showed the poses of the risk alleles to favour the  
23 F-pocket of the peptide binding groove, close to the Thr80 residue, with the control alleles generally  
24 favouring a different pocket. The data are thus suggestive that Thr80 may be a critical residue in  
25 HLA-mediated anti-thyroid drug induced agranulocytosis, and thus can guide future research and  
26 risk assessment.

## 27 **Introduction**

28 Adverse drug reactions have been linked to Human Leukocyte Antigens (HLA) in multiple different  
29 studies, where an individual carrying a specific risk allele has a higher risk of developing a reaction to  
30 that drug, including skin conditions like Stevens-Johnson syndrome and toxic epidermal necrolysis  
31 (SJS/TEN) and drug induced liver injury (1-3). HLA proteins play a role in the adaptive immune  
32 response, presenting peptides to the T-cell receptors. Non-self peptides are then recognised and  
33 elicit an immune response where appropriate (4). Occasionally, unnatural interaction of drugs during  
34 this process results in an adverse drug reaction. The role of HLA in these adverse drug reactions has  
35 been hypothesised in three main ways: the Hapten model, the Pharmacological Interaction model  
36 and the Altered Peptide Repertoire model. The *Hapten* model predicts the drug binds covalently to a  
37 self-protein and is processed via HLA molecules; this drug-protein combination is presented and  
38 recognised as being non-self, initiating an immune response (5). The *Pharmacological Interaction (PI)*  
39 model predicts the drugs bind directly to the TCR or via the formation of HLA-drug complexes which  
40 activate T cells and thus initiate an immune response without the need for a specific peptide ligand  
41 (6). Except where noted below, the results presented here work under the assumption that the  
42 drugs we are investigating here will follow the *Altered Peptide Repertoire* model, with the drug  
43 interacting non-covalently with the HLA molecule directly within the antigen presentation site. This  
44 leads to a difference in the self-peptide set that is presented to the T-cell receptors and thus,  
45 initiating an immune response (7). Currently, the most widely investigated HLA-ADR association is

46 that of abacavir with B\*57:01. For this association, the crystal structure of the drug bound in  
47 complex with the risk allele is available (8, 9). Illing *et al.* (8) and Ostrov *et al.* (9) have demonstrated  
48 the Altered Peptide Repertoire model with high confidence for abacavir, including the crystal  
49 structure for abacavir bound in the peptide binding groove of the associated risk allele, B\*57:01,  
50 along with proteomics evidence for different peptides being presented in the bound and unbound  
51 cases (8).

52 The peptide binding groove of the HLA is a long hydrophobic cleft formed between the  $\alpha$ -helices and  
53  $\beta$ -sheet platform. This cleft is much larger than the naturally involved binding sites that proteins  
54 have for small organic molecules. The peptide binding groove contains six subsites (S4 Fig). The size  
55 and stereochemistry of the subsites are determined by the polymorphic residues along the cleft (10).  
56 The specificity of peptide binding is determined, in part, by the interactions between anchor  
57 residues on the peptide side chains at two or more of these subsites (11).

58 Anti-thyroid drugs are used to treat hyperthyroidism as they normalise thyroid function through  
59 binding to the thyroid peroxidase enzyme (12). These drugs are thioamides containing a  
60 thiocarbonyl group and a thiourea moiety within a heterocyclic structure. The common agents used  
61 are methimazole, carbimazole and propylthiouracil (13). Agranulocytosis has been defined as  
62 absolute neutrophil count below 500/ $\mu$ l of blood and includes not only neutrophil count but also the  
63 absolute number of eosinophils, basophils and mast cells (14). Patients with severe neutropenia are  
64 likely to experience infections which may be life-threatening or even fatal. The mechanism of anti-  
65 thyroid induced agranulocytosis is through either direct toxicity or immune-mediated toxicity (14).  
66 The incidence of agranulocytosis in England and Wales has been estimated at around 7 cases per  
67 million people per year, with an adjusted odds ratio for neutropenia of 34.7 for users of thyroid  
68 inhibitors (i.e. anti-thyroid drugs) (15). Most cases of agranulocytosis are idiosyncratic reactions to  
69 drugs or their metabolites, including anti-thyroid drugs. Other causes include splenic sequestration,  
70 nutritional deficiencies, infections, immune neutropenia, haematological disease and primary

71 congenital or chronic neutropenia (16). An increased risk of agranulocytosis has been associated  
 72 with anti-thyroid drugs carbimazole, methimazole and propylthiouracil for three different HLA alleles  
 73 in Asian and Caucasian populations, these associations are shown in Table 1.

74 **Table 1: HLA associations seen carbimazole, methimazole and propylthiouracil across populations.**

| Study                       | Allele(s)<br>Associated | Drug(s)<br>Associated                          | Cohort<br>Ethnicity | Cohort size |         | Odds<br>Ratio | P-value                |
|-----------------------------|-------------------------|------------------------------------------------|---------------------|-------------|---------|---------------|------------------------|
|                             |                         |                                                |                     | Risk        | Control |               |                        |
| He <i>et al.</i> (17)       | B*27:05                 | methimazole<br>propylthiouracil                | Han Chinese         | 27          | 135     | 66.24         | 9.24x10 <sup>-5</sup>  |
|                             | B*38:02                 |                                                |                     |             |         | 7.525         | 8.68x10 <sup>-4</sup>  |
|                             | DRB1*08:03              |                                                |                     |             |         | 4.316         | 2.8x10 <sup>-3</sup>   |
| Chen <i>et al.</i> (18)     | B*38:02                 | methimazole<br>carbimazole<br>propylthiouracil | Taiwanese           | 42          | 1208    | 21.48         | 6.28x10 <sup>-18</sup> |
|                             | DRB1*08:03              |                                                |                     |             |         | 6.13          | 1.35x10 <sup>-8</sup>  |
| Thao <i>et al.</i> (19)     | B*38:02                 | methimazole<br>propylthiouracil                | Vietnamese          | 21          | 81      | 28.6          | 5.2x10 <sup>-7</sup>   |
| Hallberg <i>et al.</i> (20) | B*27:05                 | methimazole<br>carbimazole<br>propylthiouracil | Caucasian           | 234         | 5170    | 3.24          | 1.20x10 <sup>-11</sup> |

75

76 The structures of methimazole and propylthiouracil are shown in S5 Fig. It can be seen that these  
 77 two associated drugs share a common thiocarbonyl group, which is also seen in the experimental  
 78 anti-thyroid drugs. The associated anti-thyroid drugs share a common target, thyroid peroxidase, in  
 79 their normal mechanism of action (21). A study by Pradhan *et al.* conducted molecular docking of  
 80 methimazole and propylthiouracil with thyroid peroxidase. The results of this study predicted both  
 81 drugs to bind in the same position, with the sulphur group forming a hydrogen bond with Arg491 of  
 82 the thyroid peroxidase, resulting in inhibition of thyroid hormone production (12). As these drugs  
 83 show similar binding to the same target, it is reasonable to hypothesise that both drugs might also  
 84 have a shared mechanism for the adverse drug reaction, going some way to explaining why multiple

85 drugs have been associated with the same alleles. It can be noted that methimazole is more  
86 commonly associated than propylthiouracil, although neither drug has been studied in isolation (17,  
87 18, 20). In the He et al. study, there were 26 methimazole agranulocytosis cases compared to 3 for  
88 propylthiouracil. For the Chen et al. study, of the 42 thioamide-induced agranulocytosis cases, it was  
89 stated that 9 of these were patients taking carbimazole, 9 propylthiouracil and 23 methimazole. For  
90 the Hallberg et al. study, 39 cases were induced by anti-thyroid agents, of these 29 were  
91 methimazole, 5 carbimazole and 5 propylthiouracil. Although all three anti-thyroid drugs have been  
92 incorporated into the association studies, our study focuses on the associations seen with  
93 methimazole and propylthiouracil. Carbimazole is the pro-drug of methimazole, responsible for the  
94 antithyroid activity, and has a short half-life of 5.3-5.4 hours with peak plasma concentrations of  
95 methimazole being present after 1 or 2 hours (22, 23). We are working under the assumption that  
96 the mechanisms involved in the adverse drug reaction follow the altered peptide repertoire model,  
97 the active drug methimazole would be most likely to interact with the HLA during this process and so  
98 carbimazole is excluded from this analysis.

99 B\*38:02 has a very similar sequence to B\*38:01 with only one residue difference (B\*38:02 Thr80Ile  
100 B\*38:01). It therefore is highly possible that B\*38:01 could also be a risk allele in this context.  
101 B\*38:02 (S6 Fig) is most commonly found in Asian populations (0.69%-6.6%, frequencies taken from  
102 Allele Frequency Net Database (AFND) (24)), with Caucasian (0.003-0.2%) and African populations  
103 (0.007-0.06%) having much lower frequencies. B\*38:01 is more commonly found in Caucasian  
104 populations (0.6-6.7%), compared to Asian populations (0.15-1.0%) and therefore allele frequencies  
105 for B\*38:01 in the Asian populations studies are likely not detected (S7 Fig). The Hallberg *et al.* study  
106 (which found B\*27:05 to be significantly associated) was based on Caucasian populations with a high  
107 proportion of Swedish patients. Comparing the allele frequencies from AFND (24) for B\*27:05 (S8  
108 Fig) and B\*38:01 in Swedish populations, B\*27:05 shows frequencies between 10.5 and 20% with  
109 B\*38:01 showing no entries – usually indicating that the allele was not detected in these  
110 populations. It could therefore be plausible that the B\*38:01 allele could be an ADR-associated allele

111 but this is not seen in the association study due to B\*38:01 being a low frequency allele in Swedish  
112 populations. However, without case-tolerant association studies showing patients with B\*38:01, this  
113 association cannot be confirmed or rejected. For the purpose of this study, the B\*38:01 is  
114 considered as a possible risk allele.

115 A previous study conducted by Chen *et al.* completed molecular docking with methimazole and  
116 propylthiouracil docked with B\*38:02, B\*38:01 and DRB1\*08:03. This study showed poses favouring  
117 both the B- and F-pockets along the peptide binding groove. Four suspected key residues were  
118 identified: Cys67, Asn77, Thr80 and Thr123. Their study focussed on the associations seen in Taiwan  
119 individuals and therefore does not include investigations into the B\*27:05 alleles seen in Caucasian  
120 populations. Due to the differences in general structure between Class I and Class II HLA, it is difficult  
121 to compare docking predictions between the two allele classes. The B\*38:02 and B\*38:01 alleles  
122 were modelled using the same template structures, with the DRB1\*08:03 structure modelled using  
123 only DRB1\*01:01 as a template. The quality of the models used for molecular docking can impact the  
124 docking results and therefore the selection of templates is very important.

125 The purpose of this study is to investigate the associated alleles, in particular looking for  
126 commonalities between the two associated HLA-B alleles in order to look for similarities in these  
127 alleles that might shed light on the underlying mechanisms of the adverse drug reactions seen.

## 128 **Methods**

### 129 **Sequence and structural analysis**

130 In order to conduct a reliable analysis between cases and controls, the control alleles must first be  
131 carefully selected to ensure they can be reliably assumed to be non-associated. The case and control  
132 frequencies from He *et al.* (17), Chen *et al.* (18) and Hallberg *et al.* (20) were compared alongside  
133 healthy individual frequency data obtained from AFND (24). Alleles where the study control allele

134 frequency or healthy individual frequencies sourced from AFND were similar to or greater than the  
135 case allele frequencies were selected as controls (Supplementary material i). These alleles could  
136 safely be assumed to be non-associated as they do not show enrichment in the case groups.

137 Structural differences were assessed between the risk and selected control alleles. Firstly, the  
138 peptide binding regions were compared, this is likely where the drug binding would occur and so  
139 differences here would be important for the mechanism of interaction involved in the adverse drug  
140 reaction. The peptide binding regions were compared using MHC motif viewer (25) and MHCcluster  
141 (26). MHC motif viewer was used to compare the predicted binding motifs for the B\*27:05 and  
142 B\*38:02 risk alleles as well as the B\*38:01 possible risk and the selected control alleles. MHCcluster  
143 was similarly used to compare the global similarities of peptide binding predictions for the risk,  
144 possible risk and selected control alleles. Both the MHC motif viewer and MHCcluster post-process  
145 NetMHCpan scores to give predictions of motifs or similarities between peptides. NetMHCpan uses  
146 artificial neural networks to predict the peptide binding of HLA molecules based on IEDB  
147 experimental data of peptides known to be presented by given alleles, including data for the binding  
148 of peptides to B\*27:05 and B\*38:01 (27, 28). Therefore, the predictions generated will be based  
149 largely on experimental data.

150 The protein molecules were further compared using multiple sequence alignment to view  
151 differences across the whole protein and also individual residue changes within sub-pockets along  
152 the peptide binding groove between the risk and control alleles. Firstly, the sequences for the risk,  
153 possible risk and control alleles were aligned. The alignments were then extended to look at  
154 common alleles selected from AFND and NMDP (National Marrow Donor Program) (20, 24) Asian  
155 and Caucasian populations and extended further again to consider common alleles found in all  
156 populations. When considering the common alleles, it is important to note that the definitive risk  
157 profile (association status) of these alleles is unknown. Although, due to the high frequency and the  
158 fact that they have not been seen to be associated with agranulocytosis, it can be assumed that

159 these alleles are likely not associated. These multiple sequence alignments allow us to look for  
160 residue similarities unique to the risk alleles and therefore identify residues which may be involved  
161 in the mechanism of binding for the adverse drug reactions.

## 162 **Molecular Docking**

163 Molecular docking was used to compare the predicted binding sites between risk and control alleles.  
164 Crystal structures were obtained from the PDB database where available. For those alleles where the  
165 crystal structures are not available, the structures were predicted using Modeller (29, 30). Crystal  
166 structures, given the suffix ‘\_S’, were available for B\*27:05 (1OGT (31)), B\*15:01 (1XR9 (32)) and  
167 B\*51:01 (1E27 (33)). Homology models, given the suffix ‘\_M’, were created for B\*38:02, B\*38:01,  
168 B\*40:06, B\*46:01 and B\*54:01 (S1 Table). Methimazole, the active form of carbimazole, and  
169 propylthiouracil were used to dock with the B\*27:05\_S and B\*38:02\_M risk alleles, B\*38:01\_M  
170 possible risk allele and selected control alleles; B\*15:01\_S, B\*40:06\_M, B\*46:01\_M, B\*51:01\_S and  
171 B\*54:01\_M.

172 Structures and sequences of three similar alleles were obtained searching the PDB database using  
173 BLAST-P (34). The structures for these similar alleles, with high sequence identity (e.g. 95-98%  
174 identity for the B\*38:02 templates), were then used as templates for Modeller. Target and template  
175 sequences were aligned with ClustalX (35) and ten models were made for each structure, using  
176 Modeller 9.9 automodel class (36). The model with the lowest objective function was chosen for the  
177 docking. S1 Table summarises the structures and models obtained. Drug structures for methimazole  
178 and propylthiouracil were both obtained from the PDB database (5FF1 (37) and 5HPW (38)  
179 respectively).

180 AutoDockFR (39) was used to dock both methimazole and propylthiouracil with the B\*27:05 and  
181 B\*38:02 risk alleles, B\*38:01 possible risk allele and the selected control alleles. Structural PDBQT  
182 files were prepared using AutoDock Tools (40) for both the alleles and drug structures. AutoGrid (41)



183 was used to map the target allele structures and select grid points in order to search both the  
184 peptide binding groove (PBG) and the top three largest pockets (Top3). The top three largest pockets  
185 were selected by pocket volume. Searching the largest pockets on the protein increases the search  
186 space to cover more of the protein and allows an alternate binding position away from the peptide  
187 binding region. This helps identify if the peptide binding groove is in fact the most favourable binding  
188 region, ensuring the most favourable poses are obtained. A total of 10 poses were obtained for each  
189 allele for each drug and each search space, resulting in 20 poses per allele for each drug. Further  
190 analysis was completed conducting 100 runs for each drug-allele combination (supplementary  
191 material ii), this allowed further analysis of the favouring of binding pockets. These poses were then  
192 automatically assigned positions (i.e. binding in B or F pocket) using k-mean analysis and used to  
193 visualise the favouring of binding positions for each drug-allele combination. LigPlot (42) was used to  
194 visualise the interactions for each of the lowest scoring poses for each drug-allele combination, in  
195 order to compare the residues involved with binding.

196 In order to investigate how the size and structure of the ligands and pockets could be having an  
197 impact on the molecular docking results, similar molecules were docked to each of the risk and  
198 control alleles. The PDB database was searched for ligands with  $\geq 50\%$  similarity to methimazole and  
199 propylthiouracil. Four ligands were selected: MZY (1,3-dihydroimidazole-2-thione) and TUL (2-  
200 thioxo-2,3-dihydropyrimidin-4(1H)-one) have been used as experimental antithyroid drugs and  
201 include a thiocarbonyl group, DMI (2,3-Dimethylimidazolium Ion) and EVO (2-amino-6-  
202 propylpyrimidin-4(3H)-one) do not include the thiocarbonyl group, (S5 Fig). These structures were  
203 prepared in the same way as the associated anti-thyroid drugs, using AutoDock Tools (40).  
204 AutoDockFR (39) was used to dock the non-associated compounds with B\*27:05 and B\*38:02 risk  
205 alleles, B\*38:01 possible risk allele and selected control alleles. The binding positions of these were  
206 then compared to those of the associated drugs, in order to deduce if the size and structures of the  
207 ligands and pockets could be having an impact on the molecular docking results.

## 208 **Results**

### 209 **Sequence and Structural Analysis**

210 We firstly investigated whether allele frequencies for controls were representative of larger  
211 populations available in similar regions. This allows us to test for potential biased sampling in source  
212 studies, especially as controls have been combined from different countries, as well as to determine  
213 our own control (non-associated) alleles for further comparison. Case and control frequencies were  
214 calculated from the data provided for the He *et al.* and Hallberg *et al.* studies (17, 20). Alleles with  
215 study control frequency over 3% were investigated. Five alleles were selected to be used as controls:  
216 B\*15:01, B\*40:06, B\*46:01, B\*51:01 and B\*54:01. It can be reasonably assumed that these alleles  
217 are non-associated alleles based on the frequency data of both the Han Northern China and  
218 European populations (S1 Fig). The control allele selection is covered in more detail within the  
219 supplementary material (i).

220 The MHC Motif viewer (25) displays the preference for given HLA alleles to bind peptides with amino  
221 acids at given positions within an n-mer peptide e.g. 9mer for HLA class I. The motifs have been  
222 generated via the NetMHCpan (27) prediction method being run over a large selection of natural  
223 peptides, which has been trained originally with experimental data (peptides presented by given HLA  
224 alleles) from the IEDB database (28). While the predicted motifs cannot give us a direct measure of  
225 the likelihood of a drug to bind in the cleft of a given HLA allele, they can be indicative of whether  
226 different alleles share similar peptide binding regions. If the hapten hypothesis of HLA-mediated  
227 ADRs was true for anti-thyroid drugs, then the peptide binding ability of associated alleles might be  
228 related, with the caveat that drugs binding to peptides would likely change their affinity for  
229 particular alleles. Comparing the peptide binding motifs from MHC Motif Viewer (S9 Fig) it can be  
230 seen that although, as expected due to the high sequence similarity, the B\*38:02 and B\*38:01 alleles  
231 show very similar binding motifs, the B\*27:05 allele shows a very different motif. This shows that

232 there are differences between the favoured peptides and thus the peptide binding grooves of the  
233 B\*27:05 and B\*38:02 risk alleles. A similar observation can be made from the output for MHCcluster  
234 (Fig 1), with differences seen between B\*27:05 and B\*38:02. MHCcluster is also based on  
235 predictions from random human peptides processed by NetMHCpan and generates a distance  
236 measure between the peptide binding specificity scores generated by the software to create a tree  
237 representation. Similar to MHC Motif Viewer, the results can tell us about overall relatedness of  
238 predicted peptide binding by different alleles, but not directly about the likelihood of drug binding.  
239 From the tree-based output, it can be seen that the B\*38:02 and B\*38:01 alleles show very similar  
240 clustering, whereas the B\*27:05 allele shows clustering differing from this and is not more closely  
241 related to the other risk allele than any of the selected control alleles. The differences seen between  
242 the favoured peptides of the risk alleles allows us to conclude that these alleles are not structurally  
243 similar.

244 **Fig 1: MHCcluster output for risk and control alleles.** *Specificity tree shows clustering of alleles and*  
245 *heat map shows the similarity between the binding motifs of each B allele, comparing known risk and*  
246 *possible risk (B\*38:01) alleles (highlighted in blue) with selected controls. The scale shows the*  
247 *distance between the alleles, with red (0) showing very similar binding motifs and white (1) showing*  
248 *dissimilar binding motifs. Trees to the left and above the matrix show the hierarchical clustering of*  
249 *the different B alleles.*

250 Multiple sequence alignments were used to investigate individual residue differences between  
251 alleles. Comparing the B\*27:05 and B\*38:02 risk alleles with the B\*38:01 possible risk and selected  
252 controls, it can be seen that there are two residues which are seen to be unique to the risk alleles:  
253 Cys67 and Thr80 (Fig 2). These are both residues that were identified as potentially important in the  
254 Chen *et al.* study (18). When the comparisons were extended to look at common alleles, obtained  
255 from searching AFND for Caucasian and Asian populations and also common alleles found in the  
256 NMDP database (20) (S10 Fig), a similar pattern can be seen. These two residues are rarely found in

257 these common alleles, although it must be noted that the association status of these common alleles  
258 is unknown.

259 **Fig 2: Multiple sequence alignment for risk and control alleles.** (a) Multiple sequence alignment for  
260 risk alleles B\*27:05 and B\*38:02, possible risk allele B\*38:01 and selected controls B\*15:01, B\*40:06  
261 B\*46:01, B\*51:01 and B\*54:01. (b) Focusing on positions 65-83. Positions 67 and 80 highlighted in  
262 red.

## 263 Molecular docking

### 264 Methimazole

265 Methimazole was docked with each of the risk, possible risk and selected control alleles, using  
266 AutoDockFR (39), in order to compare the favourable binding positions in each case. Table 2  
267 summarises the poses seen for methimazole, showing the pocket of the lowest scoring pose, the  
268 number of poses in each pocket and the median scores for the poses in those pockets, for each  
269 search space. From this and Fig 3, showing the predicted binding positions for the top scoring pose  
270 for each allele, it can be seen that the risk alleles favour the F-pocket for drug binding, close to the  
271 position 80 identified. Both scores as well as the number of poses in each pocket, while searching  
272 the peptide binding region, favour this pocket. Extending the search space to cover the top three  
273 largest pockets, B\*27:05\_S favours a pocket outside of the peptide binding groove, although still  
274 close to the position 80 identified. B\*38:02\_M still favours the F-pocket and B\*38:01\_M favours the  
275 B-pocket, with some poses seen outside of the peptide binding groove. Control alleles B\*15:01\_S,  
276 B\*46:01\_M and B\*51:01\_S all favour the B-pocket, both with scores and number of poses, while  
277 B\*40:06\_M and B\*54:01\_M favour the F-pocket, searching the peptide binding groove. Extending  
278 the search space to cover the top three largest poses for each of these alleles, B\*15:01\_S now  
279 favours a pocket outside of the binding groove, B\*46:01\_M still shows favouring of the B-pocket and  
280 B\*40:06\_M, B\*51:01\_S and B\*54:01\_M favour the F-pocket. Comparing the interactions seen from

281 the LigPlot diagrams (S11 Fig), it can be seen that B\*27:05\_S and B\*54:01\_M both are predicted to  
 282 have potential interactions with methimazole at residue 80. The residue at position 80 of B\*27:05\_S  
 283 forms hydrophobic interactions with the thiocarbonyl group of the methimazole, where the position  
 284 80 residue for B\*52:01\_M interacts with one of the nitrogen atoms.

285 **Table 2: Summary of molecular docking positions for methimazole.**

| Status        | Allele    | Peptide Binding Groove |    |        |    |        | Extended Search Space |   |        |    |        |   |        |
|---------------|-----------|------------------------|----|--------|----|--------|-----------------------|---|--------|----|--------|---|--------|
|               |           | Lowest                 | B  | Median | F  | Median | Lowest                | B | Median | F  | Median | O | Median |
| Risk          | B*27:05_S | F                      | 5  | -3.20  | 5  | -3.26  | O                     | 2 | -3.15  | 0  | N/A    | 8 | -3.31  |
| Risk          | B*38:02_M | F                      | 1  | -3.10  | 9  | -4.39  | F                     | 1 | -3.22  | 7  | -4.39  | 2 | -3.88  |
| Possible risk | B*38:01_M | F                      | 0  | N/A    | 10 | -3.66  | O                     | 6 | -3.62  | 0  | N/A    | 4 | -3.89  |
| Control       | B*15:01_S | B                      | 8  | -3.60  | 2  | -3.58  | O                     | 2 | -3.55  | 0  | N/A    | 8 | -4.14  |
| Control       | B*40:06_M | F                      | 0  | N/A    | 10 | -3.65  | F                     | 0 | N/A    | 10 | -3.74  | 0 | N/A    |
| Control       | B*46:01_M | B                      | 10 | -3.55  | 0  | N/A    | B                     | 7 | -3.43  | 3  | -3.32  | 0 | N/A    |
| Control       | B*51:01_S | B                      | 5  | -3.58  | 5  | -3.54  | F                     | 2 | -3.54  | 8  | -3.55  | 0 | N/A    |
| Control       | B*54:01_M | F                      | 1  | -3.29  | 9  | -3.47  | F                     | 1 | -3.48  | 9  | -3.45  | 0 | N/A    |

286 *Position of the lowest scoring methimazole pose along with the number of poses in each pocket and*  
 287 *the median of the pose scores in each pocket for each of the alleles using the search space covering*  
 288 *the peptide binding groove and the top 3 pockets identified on the protein (Extended search space).*  
 289 *Scores given as kcal/mol. 'O' refers to pockets other than the B and F, i.e. outside of the binding*  
 290 *groove.*

291 **Fig 3: Molecular docking poses for methimazole.** *Top scoring docking poses of methimazole for*  
 292 *B\*38:02\_M and B\*27:05\_S risk alleles (red), B\*38:01\_M non-associated allele (orange) and the*  
 293 *control alleles (blue) B\*15:01\_S, B\*40:06\_M, B\*46:01\_M, B\*51:01\_S and B\*54:01\_M, using peptide*  
 294 *binding groove search space and top3 pockets search space for AutoDockFR.*

295 It has previously been shown that the process and parameterisation of homology modelling may  
 296 have an impact on the molecular docking results, compared to docking within a crystal structure

297 (43). It can be seen here that the control alleles favouring the F-pocket are generally the modelled  
298 structures, with the B\*15:01 and B\*51:01 known crystal structures showing favouring of the B-  
299 pocket. Similarly, B\*38:02 and B\*38:01 are both modelled structures. Due to the very high sequence  
300 similarity between these alleles, it may be that these alleles show similar binding due to the  
301 similarity of the modelled structures. Two alleles that differ little will often show similar models,  
302 although larger differences would likely have an effect. These models were shown to be structurally  
303 similar with an RMSD of 0.460Å (221 to 221 atoms).

### 304 **Propylthiouracil**

305 Both methimazole and propylthiouracil have been associated with drug induced agranulocytosis  
306 with B\*27:05 and B\*38:02. Propylthiouracil was therefore also docked with the risk, possible risk  
307 and selected control alleles using AutoDockFR (39). The docking results were then compared  
308 between alleles and with the methimazole results to identify difference in favourable binding  
309 positions between the drug-allele combinations. Table 3 summarises the poses seen for  
310 propylthiouracil, showing the pocket of the lowest scoring pose, the number of poses in each pocket  
311 and the median scores for the poses in those pockets for each search space. From this and Fig 4,  
312 showing the predicted binding positions for the top scoring pose for each allele, similar patterns to  
313 those seen for methimazole can be seen. The B\*27:05\_S and B\*38:02\_M risk alleles favour the F-  
314 pocket searching the peptide binding groove and favour other pockets outside of the peptide  
315 binding groove when extending the search, with poses shown to lie close to Thr80 and B\*38:02\_M  
316 showing the lowest scoring pose within the F-pocket. The B\*38:01\_M possible risk shows favouring  
317 of the F-pocket searching both the peptide binding groove and extending to cover the top three  
318 largest pockets. Looking at the control alleles, B\*46:01\_M favours the B-pocket with both search  
319 spaces, B\*15:01\_S favours the B-pocket with scores but not with number of poses when searching  
320 the peptide binding groove and favours pockets outside of the groove when extending the search  
321 space, including a pocket close to the Thr80 position. B\*40:06\_M, B\*51:01\_S and B\*54:01\_M all

322 favour the F-pocket with both search spaces. Comparing the LigPlot poses for the best scoring  
 323 propylthiouracil poses (S12 Fig), searching the peptide binding groove, it can be seen that  
 324 B\*27:05\_S, B\*38:02\_M, B\*38:01\_M, B\*40:06\_M, B\*51:01\_S and B\*54:01\_M all show hydrophobic  
 325 interactions with propylthiouracil at the position 80 residue. B\*27:05 and B\*38:01 show interactions  
 326 of this position with the thiocarbonyl group, B\*38:02 with the carbon tail, B\*54:01 with the oxygen  
 327 atom and both B\*40:06 and B\*51:01 with one of the nitrogen atoms, with the interaction seen in  
 328 B\*40:06 being a hydrogen bond rather than the usual hydrophobic interaction seen.

329 **Table 3: Summary of molecular docking positions for propylthiouracil.**

| Status        | Allele    | Peptide Binding Groove |    |        |    |        | Extended Search Space |    |        |    |        |    |        |
|---------------|-----------|------------------------|----|--------|----|--------|-----------------------|----|--------|----|--------|----|--------|
|               |           | Lowest                 | B  | Median | F  | Median | Lowest                | B  | Median | F  | Median | O  | Median |
| Risk          | B*27:05_S | F                      | 3  | -5.84  | 7  | -6.23  | O                     | 1  | -5.48  | 0  | N/A    | 9  | -5.69  |
| Risk          | B*38:02_M | F                      | 4  | -5.66  | 6  | -6.60  | F                     | 0  | N/A    | 3  | -6.58  | 7  | -5.62  |
| Possible risk | B*38:01_M | F                      | 0  | N/A    | 10 | -6.48  | F                     | 0  | N/A    | 10 | -6.45  | 0  | N/A    |
| Control       | B*15:01_S | B                      | 2  | -6.34  | 8  | -6.30  | O                     | 0  | N/A    | 0  | N/A    | 10 | -6.65  |
| Control       | B*40:06_M | F                      | 0  | N/A    | 10 | -5.74  | F                     | 0  | N/A    | 10 | -5.80  | 0  | N/A    |
| Control       | B*46:01_M | B                      | 10 | -6.43  | 0  | N/A    | B                     | 10 | -6.41  | 0  | N/A    | 0  | N/A    |
| Control       | B*51:01_S | F                      | 0  | N/A    | 10 | -6.45  | F                     | 3  | -6.00  | 7  | -6.44  | 0  | N/A    |
| Control       | B*54:01_M | F                      | 0  | N/A    | 10 | -6.42  | F                     | 0  | N/A    | 10 | -6.41  | 0  | N/A    |

330

331 *Position of the lowest scoring propylthiouracil pose along with the number of poses in each pocket*  
 332 *and the median of the pose scores in each pocket for each of the alleles using the search space*  
 333 *covering the peptide binding groove and the top 3 pockets identified on the protein (Extended search*  
 334 *space). Scores given as kcal/mol. 'O' refers to pockets other than the B and F, i.e. outside of the*  
 335 *binding groove.*

336 **Fig 4: Molecular docking poses for propylthiouracil.** *Top scoring docking poses of propylthiouracil*  
 337 *for B\*38:02\_M and B\*27:05\_S risk alleles (red), B\*38:01\_M non-associated allele (orange) and the*

338 *control alleles (blue) B\*15:01\_S, B\*40:06\_M, B\*46:01\_M, B\*51:01\_S and B\*54:01\_M, using peptide*  
339 *binding groove search space and top3 pockets search space for AutoDockFR.*

340 Fig 5 shows the docking scores for all drug-allele combinations, searching the peptide binding  
341 groove, when expanding the analysis to 100 runs. From this we can see consistent favouring of the F  
342 pocket for the risk alleles. Although the docking is not able to fully distinguish between the risk and  
343 controls, with the controls showing mixed favouring of the B and F pockets, it is evident that docking  
344 against the risk alleles strongly favours binding in the F pocket for each of the drugs.

345 **Fig 5: Boxplots for methimazole and propylthiouracil.** *Boxplots showing docking scores for 100*  
346 *poses searching the peptide binding groove, using both methimazole (MMZ) and propylthiouracil*  
347 *(PTU) for each of the alleles.*

348 Similar molecules to the investigated methimazole and propylthiouracil were identified: MZY, TUL,  
349 DMI and EV0. The similar molecules were docked to each of the risk and control alleles in order to  
350 deduce if the size and structures of the ligands and pockets could be having an impact on the  
351 molecular docking results (S5 Fig). From these investigations, it was found that the similar molecules  
352 that have been used as experimental anti-thyroid drugs and included the thiocarbonyl group (MZY  
353 and TUL), showed similar binding patterns to the associated anti-thyroid drugs with the risk alleles  
354 favouring the F-pocket. The possible risk B\*38:01\_M allele can be seen to favour the B-pocket by  
355 scores but the F by number of poses for MZY and favour the F for TUL (S2 Table). Control alleles  
356 B\*15:01\_S and B\*46:01\_M both favour the B via lower scores and more poses for both drugs. With  
357 control B\*51:01\_S also favouring the B for TUL considering scores but not poses. For the other  
358 molecules without the sulfhydryl group (DMI and EV0), a difference in trends is seen with the  
359 B\*27:05\_S favouring the B-pocket for both drugs and B\*38:02\_M showing the lowest scoring pose  
360 for DMI favouring the B-pocket but still favouring the F based on poses and for EV0. B\*38:01\_M  
361 possible risk still shows favouring of the F-pocket for these drugs. The controls all show favouring of



362 the B through scores and number of poses for both drugs, except B\*54:01\_M, which shows  
 363 favouring of the F-pocket for EV0. Docking poses are shown in S13 Fig.

364 Table 4 summarises the number of poses making hydrophobic interactions with position Thr80 of  
 365 both risk alleles for each of the investigated drugs. It can be seen that for B\*27:05 the associated  
 366 drugs often make Thr80 interactions with interactions with the thiocarbonyl group being most  
 367 favourable. The experimental drugs show similar interactions with Thr80 as those seen with the  
 368 associated drugs (S14 Fig). For B\*38:02, fewer interactions are made between the drugs and the  
 369 position 80 Thr residue than seen for B\*27:05 (S15 Fig). In both risk alleles, the most favourable  
 370 poses commonly form interactions between the thiocarbonyl group of methimazole,  
 371 propylthiouracil, MZY and TUL, and positions 77, 80, 81, 84 and 123. Interactions are also seen with  
 372 positions 95, 116, 124, 143 and 147. All these residues seen making interactions surround the F-  
 373 pocket. Positions 77, 80 and 123 were identified as of interest by the Chen *et al.* study (18). This adds  
 374 strength to the hypothesis that the Thr80 position could be involved in the mechanism here,  
 375 especially for B\*27:05. The structure of the ligands, mainly the 'S' group found in the associated and  
 376 experimental anti-thyroid drugs, could therefore be potentially important for the predicted binding  
 377 poses seen here.

378 **Table 4: Summary of Thr80 interactions for investigated ligands.**

| Drug | B*27:05  |         |             |                      | B*38:02  |         |             |                      |
|------|----------|---------|-------------|----------------------|----------|---------|-------------|----------------------|
|      | No Thr80 | Thr80-S | Other Thr80 | Most favourable pose | No Thr80 | Thr80-S | Other Thr80 | Most favourable pose |
| MMZ  | 5        | 4       | 1           | Thr80-S              | 10       | 0       | 0           | No Thr80             |
| PTU  | 3        | 5       | 2           | Thr80-S              | 5        | 2       | 3           | Other Thr80          |
| MZY  | 1        | 2       | 7           | Other Thr80          | 9        | 0       | 1           | No Thr80             |
| TUL  | 5        | 2       | 3           | Thr80-S              | 10       | 0       | 0           | No Thr80             |
| DMI  | 9        | 0       | 1           | No Thr80             | 10       | 0       | 0           | No Thr80             |
| EV0  | 10       | 0       | 0           | No Thr80             | 5        | 0       | 5           | Other Thr80          |

379 *Summary counts showing the number of poses seen making interactions with the Thr80 residue of*  
380 *each of the associated risk alleles for the associated drugs (MMZ and PTU), the experimental anti-*  
381 *thyroid drugs containing the thiocarbonyl group (MZY and TUL) and the other investigated ligands.*  
382 *Where 'No Thr 80' relates to poses showing no interactions between the Thr80 residue and the drug,*  
383 *'Thr80-S' shows interactions between the thiocarbonyl group and Thr80 and 'Other Thr80' indicates*  
384 *interactions made between Thr80 and the drug but not with the thiocarbonyl group. The 'Most*  
385 *favourable pose' column shows the interaction seen for the pose which showed the lowest docking*  
386 *score for each of the drug-allele combinations.*

## 387 **Discussion**

388 The purpose of this study was to investigate the associations seen between HLA and anti-thyroid  
389 alleles, focusing on the commonalities seen between the HLA-B associated alleles, to identify a  
390 potential shared mechanism. This was done through comparing the peptide binding regions,  
391 including the whole peptide binding groove and specific residue changes alongside the predicted  
392 binding positions of the drugs with each of the risk and control alleles. It was found that the risk  
393 alleles favour different peptides and so we can conclude that the gross structures of their peptide  
394 binding grooves are rather dissimilar. However, when the multiple sequence alignments were used  
395 to focus on specific residue changes, it could be seen that two residues were found to be unique to  
396 the risk alleles. These two residues, Cys67 and Thr80, were therefore considered to be potentially  
397 important for the mechanism of action for the adverse drug reactions seen, confirming the results of  
398 a previous study by Chen *et al.* where the Cys67 and Thr80 were identified, amongst others, as  
399 potentially important for the binding of the associated drugs with the risk alleles (18). From the  
400 results of the molecular docking, the risk alleles were shown to favour the F-pocket for both drugs.  
401 This pocket lies alongside the Thr80 residue which was identified as potentially important for the  
402 mechanism of action. It was seen that the Thr80 interacts hydrophobically with the thiocarbonyl  
403 group of both associated drugs in B\*27:05, with similar interactions also being seen, but to a lesser

404 extent, with B\*38:02. The residue at position 80 of the control alleles was seen to only make  
405 interactions with the methimazole for B\*54:01, although these were different interactions from  
406 those seen for the risk alleles. For propylthiouracil, this position made interactions with the molecule  
407 for three of the five control alleles, although these were again seen as different interactions to the  
408 risk, with the B\*38:01 possible risk showing similar interactions to the B\*27:05 risk allele. It is  
409 therefore reasonable to conclude that Thr80 could be involved in the mechanism of interaction, if  
410 only indirectly by influencing the conformations of the surrounding residues located around the F-  
411 pocket.

412 Although the docking results for the risk alleles showed consistent results, with the risk alleles  
413 always favouring the F-pocket, the predicted poses for the control alleles showed some variation  
414 with some drug-allele combinations favouring the B-pocket and some favouring the F-pocket.  
415 Docking has previously been shown to be imperfect when considering these complex HLA cases (43),  
416 it is therefore understandable that the docking was unable to distinguish completely between risk  
417 and control for this case. Docking results are commonly reported as the most favourable pose, here  
418 we show a comparison of multiple runs as well as comparisons with selected control alleles. The risk  
419 alleles are shown to continuously favour the F-pocket over many runs, providing evidence that this is  
420 more likely position of binding. The variation seen between controls could be due to a number of  
421 factors including the homology modelling of the protein structures. As discussed in a previous study  
422 (43), homology modelling can impact the docking performance and inaccurate models could result in  
423 inaccurate docking results. Here, the similar alleles B\*38:02 (risk) and B\*38:01 (possible risk), with  
424 one mutated residue at position 80, were docked with both of the associated drugs. These alleles  
425 showed similar binding patterns with both alleles generally favouring the F-pocket. Since we have  
426 concluded here that the Thr80 could potentially be involved in the mechanism of action, it would be  
427 expected that the B\*38:01 would show different docking results to the risk alleles as this allele does  
428 not possess a Threonine residue at position 80. However, both the B\*38:02 and B\*38:01 structures  
429 were obtained through homology modelling. This could impact the results of the molecular docking

430 as although the mutation has been modelled, it may not have been accurately represented here and  
431 the similar structures could produce similar models.

432 The results seen here confirm and build on those seen in the Chen *et al.* study (18), with Thr80 being  
433 identified as important for the mechanism of the adverse drug reaction. The Chen *et al.* study  
434 conducted docking of B\*38:02, B\*38:01 and DRB1\*08:03 with methimazole and propylthiouracil.  
435 Models were created for B\*38:02 and B\*38:01 using the same five templates (A\*24:02, C\*08:01 and  
436 A\*02:01 along with mouse MHC and human HLA-E) and the model for DRB1\*08:03 created using  
437 one template (DRB1\*01:01). The templates used for the B alleles show similarities of 83-86% with  
438 B\*38:02 and the DRB1\*01:01 template shows 92% identity with DRB1\*08:03. In this study, the  
439 B\*38:02 model was created using templates with 95-98% identity with differing templates with  
440 similar identity being used for the other modelled structures created. Model selection is a very  
441 important aspect of molecular docking and can greatly impact the docking results seen (43). This  
442 study was able to recreate similar docking results seen previously for B\*38:02 and B\*38:01, using  
443 our own modelled structures, whilst also incorporating docking results for the B\*27:05 risk allele and  
444 comparisons with selected control alleles. Here, we also went further to investigate the structural  
445 differences between the associated risk alleles and selected controls, through sequence alignments  
446 and comparison of binding motifs.

447 In order to further our understandings of the mechanisms involved here and to test the hypothesis  
448 that the Thr80 is important for binding, it would be interesting to investigate B\*38:01 further as this  
449 is a good potential biological control due to its similarity with the associated B\*38:02. For this,  
450 further association studies to confirm the association status of B\*38:01 would be needed. Structural  
451 analysis through crystal structures would be needed to confirm the binding predictions of the drug  
452 allele combinations investigated and therefore the involvement of Thr80 in the predisposition to this  
453 adverse drug reaction.

## 454 **Acknowledgments**

455 The research was part-funded by the Medical Research Council grant for the Centre for Drug Safety  
456 Science, University of Liverpool (Grant Number: MR/L006758/1). The funders had no role in study  
457 design, data collection and analysis, decision to publish, or preparation of the manuscript.

## 458 **References**

- 459 1. Negrini S, Becquemont L. HLA-associated drug hypersensitivity and the prediction of adverse  
460 drug reactions. *Pharmacogenomics*. 2017;18(15):1441-57.
- 461 2. Illing PT, Purcell AW, McCluskey J. The role of HLA genes in pharmacogenomics: unravelling  
462 HLA associated adverse drug reactions. *Immunogenetics*. 2017;69(8-9):617-30.
- 463 3. Chen CB, Abe R, Pan RY, Wang CW, Hung SI, Tsai YG, et al. An Updated Review of the  
464 Molecular Mechanisms in Drug Hypersensitivity. *J Immunol Res*. 2018;2018:6431694.
- 465 4. Coico R, Sunshine G. *Immunology. [electronic book] : a short course: West Sussex, England :*  
466 *Wiley Blackwell*, 2015.  
467 Seventh edition.
- 468 5. Yun J, Cai F, Lee FJ, Pichler WJ. T-cell-mediated drug hypersensitivity: immune mechanisms  
469 and their clinical relevance. *Asia Pac Allergy*. 2016;6(2):77-89.
- 470 6. Pavlos R, Mallal S, Phillips E. HLA and pharmacogenetics of drug hypersensitivity.  
471 *Pharmacogenomics*. 2012;13(11):1285-306.
- 472 7. Yun J, Cai FF, Lee FJ, Pichler WJ. T-cell-mediated drug hypersensitivity: immune mechanisms  
473 and their clinical relevance. *Asia Pacific Allergy*. 2016;6(2):77-89.
- 474 8. Illing PT, Vivian JP, Dudek NL, Kostenko L, Chen Z, Bharadwaj M, et al. Immune self-reactivity  
475 triggered by drug-modified HLA-peptide repertoire. *Nature*. 2012;486(7404):554-8.
- 476 9. Ostrov DA, Grant BJ, Pompeu YA, Sidney J, Harndahl M, Southwood S, et al. Drug  
477 hypersensitivity caused by alteration of the MHC-presented self-peptide repertoire. *Proc Natl Acad*  
478 *Sci U S A*. 2012;109(25):9959-64.
- 479 10. Zeng Z, Castano AR, Segelke BW, Stura EA, Peterson PA, Wilson IA. Crystal structure of  
480 mouse CD1: An MHC-like fold with a large hydrophobic binding groove. *Science*.  
481 1997;277(5324):339-45.
- 482 11. Johansen TE, McCullough K, Catipovic B, Su XM, Amzel M, Schneck JP. Peptide binding to  
483 MHC class I is determined by individual pockets in the binding groove. *Scand J Immunol*.  
484 1997;46(2):137-46.
- 485 12. Pradhan S, Sarma H, Bharadwaz B, Mattaparthi VSK. Comparative Study on the Binding  
486 Affinity of Methimazole and Propylthiouracil to Thyroid Peroxidase as an Anti-Thyroid Drug: An  
487 *Insilico Approach*2017.
- 488 13. John M, Sundrarajan R, Gomadam SS. Anti-thyroid drugs in pediatric Graves' disease. *Indian J*  
489 *Endocrinol Metab*. 2015;19(3):340-6.
- 490 14. Vicente N, Cardoso L, Barros L, Carrilho F. Antithyroid Drug-Induced Agranulocytosis: State of  
491 the Art on Diagnosis and Management. *Drugs R D*. 2017;17(1):91-6.
- 492 15. van Staa TP, Boulton F, Cooper C, Hagenbeek A, Inskip H, Leufkens HG. Neutropenia and  
493 agranulocytosis in England and Wales: incidence and risk factors. *Am J Hematol*. 2003;72(4):248-54.
- 494 16. Andres E, Zimmer J, Affenberger S, Federici L, Alt M, Maloisel F. Idiosyncratic drug-induced  
495 agranulocytosis: Update of an old disorder. *Eur J Intern Med*. 2006;17(8):529-35.
- 496 17. He Y, Zheng J, Zhang Q, Hou P, Zhu F, Yang J, et al. Association of HLA-B and HLA-DRB1  
497 polymorphisms with antithyroid drug-induced agranulocytosis in a Han population from northern  
498 China. *Sci Rep*. 2017;7(1):11950.

- 499 18. Chen PL, Shih SR, Wang PW, Lin YC, Chu CC, Lin JH, et al. Genetic determinants of antithyroid  
500 drug-induced agranulocytosis by human leukocyte antigen genotyping and genome-wide association  
501 study. *Nat Commun.* 2015;6:7633.
- 502 19. Thao MP, Tuan PVA, Linh LGH, Van Hoang L, Hen PH, Hoa LT, et al. Association of HLA-B(  
503 \*)38:02 with Antithyroid Drug-Induced Agranulocytosis in Kinh Vietnamese Patients. *Int J Endocrinol.*  
504 2018;2018:7965346.
- 505 20. Hallberg P, Eriksson N, Ibanez L, Bondon-Guitton E, Kreutz R, Carvajal A, et al. Genetic  
506 variants associated with antithyroid drug-induced agranulocytosis: a genome-wide association study  
507 in a European population. *Lancet Diabetes Endocrinol.* 2016;4(6):507-16.
- 508 21. Wishart DS, Feunang YD, Guo AC, Lo EJ, Marcu A, Grant JR, et al. DrugBank 5.0: a major  
509 update to the DrugBank database for 2018. *Nucleic Acids Res.* 2018;46(D1):D1074-D82.
- 510 22. Datapharm. The electronic Medicines Compendium (eMC) [Available from:  
511 <https://www.medicines.org.uk/emc/>.
- 512 23. Kampmann JP, Hansen JM. Clinical pharmacokinetics of antithyroid drugs. *Clin*  
513 *Pharmacokinet.* 1981;6(6):401-28.
- 514 24. Gonzalez-Galarza FF, Takeshita LY, Santos EJ, Kempson F, Maia MH, da Silva AL, et al. Allele  
515 frequency net 2015 update: new features for HLA epitopes, KIR and disease and HLA adverse drug  
516 reaction associations. *Nucleic Acids Res.* 2015;43(Database issue):D784-8.
- 517 25. Rapin N, Hoof I, Lund O, Nielsen M. MHC motif viewer. *Immunogenetics.* 2008;60(12):759-  
518 65.
- 519 26. Thomsen M, Lundegaard C, Buus S, Lund O, Nielsen M. MHCcluster, a method for functional  
520 clustering of MHC molecules. *Immunogenetics.* 2013;65(9):655-65.
- 521 27. Hoof I, Peters B, Sidney J, Pedersen LE, Sette A, Lund O, et al. NetMHCpan, a method for  
522 MHC class I binding prediction beyond humans. *Immunogenetics.* 2009;61(1):1-13.
- 523 28. Vita R, Mahajan S, Overton JA, Dhanda SK, Martini S, Cantrell JR, et al. The Immune Epitope  
524 Database (IEDB): 2018 update. *Nucleic Acids Res.* 2019;47(D1):D339-D43.
- 525 29. Webb B, Sali A. Comparative Protein Structure Modeling Using MODELLER. *Curr Protoc*  
526 *Bioinformatics.* 2014;47:5 6 1-32.
- 527 30. Webb B, Madhusudhan. MS, Shen. M-Y, Dong. G, Marc A. Marti-Renom NE, Frank Alber,  
528 Maya Topf,, Baldomero Oliva AF, Roberto Sánchez, Bozidar Yerkovich,, et al. Method for  
529 comparative protein structure modeling by MODELLER 2015 [Release 9.15, r10497:[Available from:  
530 <https://salilab.org/modeller/9.15/manual/node11.html>.
- 531 31. Hulsmeier M, Fiorillo MT, Bettosini F, Sorrentino R, Saenger W, Ziegler A, et al. Dual, HLA-  
532 B27 subtype-dependent conformation of a self-peptide. *J Exp Med.* 2004;199(2):271-81.
- 533 32. Roder G, Blicher T, Justesen S, Johannesen B, Kristensen O, Kastrup J, et al. Crystal structures  
534 of two peptide-HLA-B\*1501 complexes; structural characterization of the HLA-B62 supertype. *Acta*  
535 *Crystallogr D Biol Crystallogr.* 2006;62(Pt 11):1300-10.
- 536 33. Maenaka K, Maenaka T, Tomiyama H, Takiguchi M, Stuart DI, Jones EY. Nonstandard peptide  
537 binding revealed by crystal structures of HLA-B\*5101 complexed with HIV immunodominant  
538 epitopes. *J Immunol.* 2000;165(6):3260-7.
- 539 34. Altschul SF, Madden TL, Schaffer AA, Zhang J, Zhang Z, Miller W, et al. Gapped BLAST and  
540 PSI-BLAST: a new generation of protein database search programs. *Nucleic Acids Res.*  
541 1997;25(17):3389-402.
- 542 35. Thompson JD, Gibson TJ, Plewniak F, Jeanmougin F, Higgins DG. The CLUSTAL\_X windows  
543 interface: flexible strategies for multiple sequence alignment aided by quality analysis tools. *Nucleic*  
544 *Acids Res.* 1997;25(24):4876-82.
- 545 36. Sali A, Blundell TL. Comparative protein modelling by satisfaction of spatial restraints. *J Mol*  
546 *Biol.* 1993;234(3):779-815.
- 547 37. Singh RP, Singh A, Sirohi HV, Singh AK, Kaur P, Sharma S, et al. Dual binding mode of  
548 antithyroid drug methimazole to mammalian heme peroxidases - structural determination of the  
549 lactoperoxidase-methimazole complex at 1.97 Å resolution. *FEBS Open Bio.* 2016;6(7):640-50.

- 550 38. Singh RP, Singh A, Kushwaha GS, Singh AK, Kaur P, Sharma S, et al. Mode of binding of the  
551 antithyroid drug propylthiouracil to mammalian haem peroxidases. *Acta Crystallogr F Struct Biol*  
552 *Commun.* 2015;71(Pt 3):304-10.
- 553 39. Ravindranath PA, Forli S, Goodsell DS, Olson AJ, Sanner MF. AutoDockFR: Advances in  
554 Protein-Ligand Docking with Explicitly Specified Binding Site Flexibility. *PLoS Comput Biol.*  
555 2015;11(12):e1004586.
- 556 40. Sanner MF. Python: a programming language for software integration and development. *J*  
557 *Mol Graph Model.* 1999;17(1):57-61.
- 558 41. Sanner MF, Olson AJ, Spehner JC. Reduced surface: an efficient way to compute molecular  
559 surfaces. *Biopolymers.* 1996;38(3):305-20.
- 560 42. Wallace AC, Laskowski RA, Thornton JM. LIGPLOT: a program to generate schematic  
561 diagrams of protein-ligand interactions. *Protein Eng.* 1995;8(2):127-34.
- 562 43. Ramsbottom KA, Carr DF, Jones AR, Rigden DJ. Critical assessment of approaches for  
563 molecular docking to elucidate associations of HLA alleles with adverse drug reactions. *Mol*  
564 *Immunol.* 2018;101:488-99.
- 565 44. Saper MA, Bjorkman PJ, Wiley DC. Refined structure of the human histocompatibility antigen  
566 HLA-A2 at 2.6 Å resolution. *J Mol Biol.* 1991;219(2):277-319.
- 567 45. Sidney J, Peters B, Frahm N, Brander C, Sette A. HLA class I supertypes: a revised and  
568 updated classification. *BMC Immunol.* 2008;9:1.
- 569 46. Schrodinger, LLC. The PyMOL Molecular Graphics System, Version 1.8. 2015.

570



## 571 **Supporting Information**

572 **S1 Table: Structures obtained for risk and control alleles**

573 **S2 Table: Summary of molecular docking positions for investigated compounds.** Position of the  
574 lowest scoring poses for each of the drug-allele combinations, along with the number of poses in  
575 each pocket and the median of the pose scores in each pocket for each of the alleles using a search  
576 space covering the peptide binding groove. Scores given as kcal/mol.

577 **S1 Fig: Bar chart of allele frequencies for investigated populations.** Healthy population frequencies  
578 obtained from AFND (24) along with Case and Control frequencies for alleles from the He et al. study  
579 (17) (Han Northern China) with control frequency over 3% and alleles from the Hallberg et al. study  
580 (20) with AFND frequency greater than 3% in at least one population (Sweden, France, Spain, or  
581 Germany). Panels show alleles separated not only by population but also separating those alleles  
582 that were selected as suitable controls.

583 **S2 Fig: Clustering analysis and docking predicted docking poses of 100 runs.** F pocket predictions  
584 shown in purple, B pocket predictions shown in yellow. Top scoring docking poses of methimazole  
585 and propylthiouracil for B\*38:02\_M and B\*27:05\_S risk alleles (red), B\*38:01\_M non-associated  
586 allele (orange) and the control alleles (blue) B\*15:01\_S, B\*40:06\_M, B\*46:01\_M, B\*51:01\_S and  
587 B\*54:01\_M, using peptide binding groove search space for AutoDockFR.

588 **S3 Fig: Alignment of positions potentially involved in binding for the B and F pockets.** Unique  
589 matches identified at these positions are shown highlighted in red.

590 **S4 Fig: Organisation of subsites along the HLA peptide binding groove.** The six subsites along the  
591 peptide binding groove (A-F) are shown highlighted (44, 45). Image created using PyMOL (46).



592 **S5 Fig: Structure of investigated drugs.** Structure of associated drugs methimazole and  
593 propylthiouracil along with similar ligands, some of which have been used as experimental anti-  
594 thyroid drugs.

595 **S6 Fig: Allele frequency distribution for B\*38:02.** Allele frequency distribution map obtained from  
596 AFND (24). The size of the circles represent the sample size of each population with the colour  
597 representing the allele frequency, as shown by the key, with low frequency alleles shown in blue, mid  
598 in green and high in orange/red.

599 **S7 Fig: Allele frequency distribution for B\*38:01.** Allele frequency distribution map obtained from  
600 AFND (24). The size of the circles represent the sample size of each population with the colour  
601 representing the allele frequency, as shown by the key, with low frequency alleles shown in blue, mid  
602 in green and high in orange/red.

603 **S8 Fig: Allele frequency distribution for B\*27:05.** Allele frequency distribution map obtained from  
604 AFND (24). The size of the circles represent the sample size of each population with the colour  
605 representing the allele frequency, as shown by the key, with low frequency alleles shown in blue, mid  
606 in green and high in orange/red.

607 **S9 Fig: MHC motif viewer output for risk and control alleles.** MHC Motif Viewer outputs for B\*27:05  
608 and B\*38:02 risk alleles and B\*38:01 possible risk alleles, showing predicted peptide binding motifs  
609 for each allele. Amino acids are coloured according to their physicochemical properties; acidic (D, E)  
610 coloured red, basic (H, K, R) coloured blue, hydrophobic (A, C, F, I, L, M, P, V, W) coloured black and  
611 Neutral (G, N, Q, S, T, Y) coloured green. The height of the column of letters is equal to the  
612 information content at that position and the height of the letter within the column is proportional to  
613 the frequency of the corresponding amino acid at that position. Where available, the reliability index  
614 is shown in the centre of the circle above the logo plot and is given as the estimated Pearson

615 correlation coefficient for neural network predictions on the given alleles. The closest neighbour is  
616 also shown along with the distance to this neighbouring allele (25).

617 **S10 Fig: Multiple sequence alignment for risk, control and common alleles.** (a) Multiple sequence  
618 alignment for risk alleles B\*27:05 and B\*38:02, possible risk allele B\*38:01 and top 10 most frequent  
619 alleles for Caucasian, Asian populations selected from AFND and NMDP populations (repeats  
620 removed). (b) Focusing on positions 65-83. (c) Multiple sequence alignment for risk alleles B\*27:05  
621 and B\*38:02, along with possible risk allele B\*38:01 and AFND top 20 most common alleles and  
622 NMDP top 10 most common for Caucasian, Asian and all populations (repeats removed – 30 unique  
623 sequences including risk alleles). (d) Focusing on positions 65-83. Positions 67 and 80 highlighted in  
624 red.

625 **S11 Fig: LigPlot figures for methimazole.** LigPlot figures show the interactions between methimazole  
626 and the residues on each allele for each of the risk, suspected risk and control alleles, for the top  
627 scoring pose searching the peptide binding groove. Circles show comparisons between alleles, amino-  
628 acids at positions found interacting for B\*27:05 highlighted with red circle. Hydrogen bonds are  
629 shown by green dotted lines.

630 **S12 Fig: LigPlot figures for propylthiouracil.** LigPlot figures show the interactions between  
631 propylthiouracil and the residues on each allele for each of the risk, possible risk and control alleles,  
632 for the top scoring pose searching the peptide binding groove. Circles show comparisons between  
633 alleles, amino-acids at positions found interacting for B\*27:05 highlighted with red circle. Hydrogen  
634 bonds are shown by green dotted lines.

635 **S13 Fig: Predicted binding poses for investigated ligands.** Top scoring binding poses for B\*27:05\_S  
636 searching the peptide binding groove for each of the investigated drugs. Red poses show associated  
637 allele poses, orange shows B\*38:01\_M non-associated allele poses and blue the control allele poses.

638 **S14 Fig: LigPlot figures for B\*27:05.** LigPlot figures show the interactions between B\*27:05 and each  
639 of the investigated ligands for the top scoring pose searching the peptide binding groove. Circles  
640 show comparisons between alleles, amino-acids at positions found interacting for MMZ highlighted  
641 with red circle. Hydrogen bonds shown by green dotted lines. Hydrophobic bonds shown in red.

642 **S15 Fig: LigPlot figures for B\*38:02.** LigPlot figures show the interactions between B\*38:02 and each  
643 of the investigated ligands for the top scoring pose searching the peptide binding groove. Circles  
644 show comparisons between alleles, amino-acids at positions found interacting for MMZ highlighted  
645 with red circle. Hydrogen bonds shown by green dotted lines. Hydrophobic bonds shown in red.

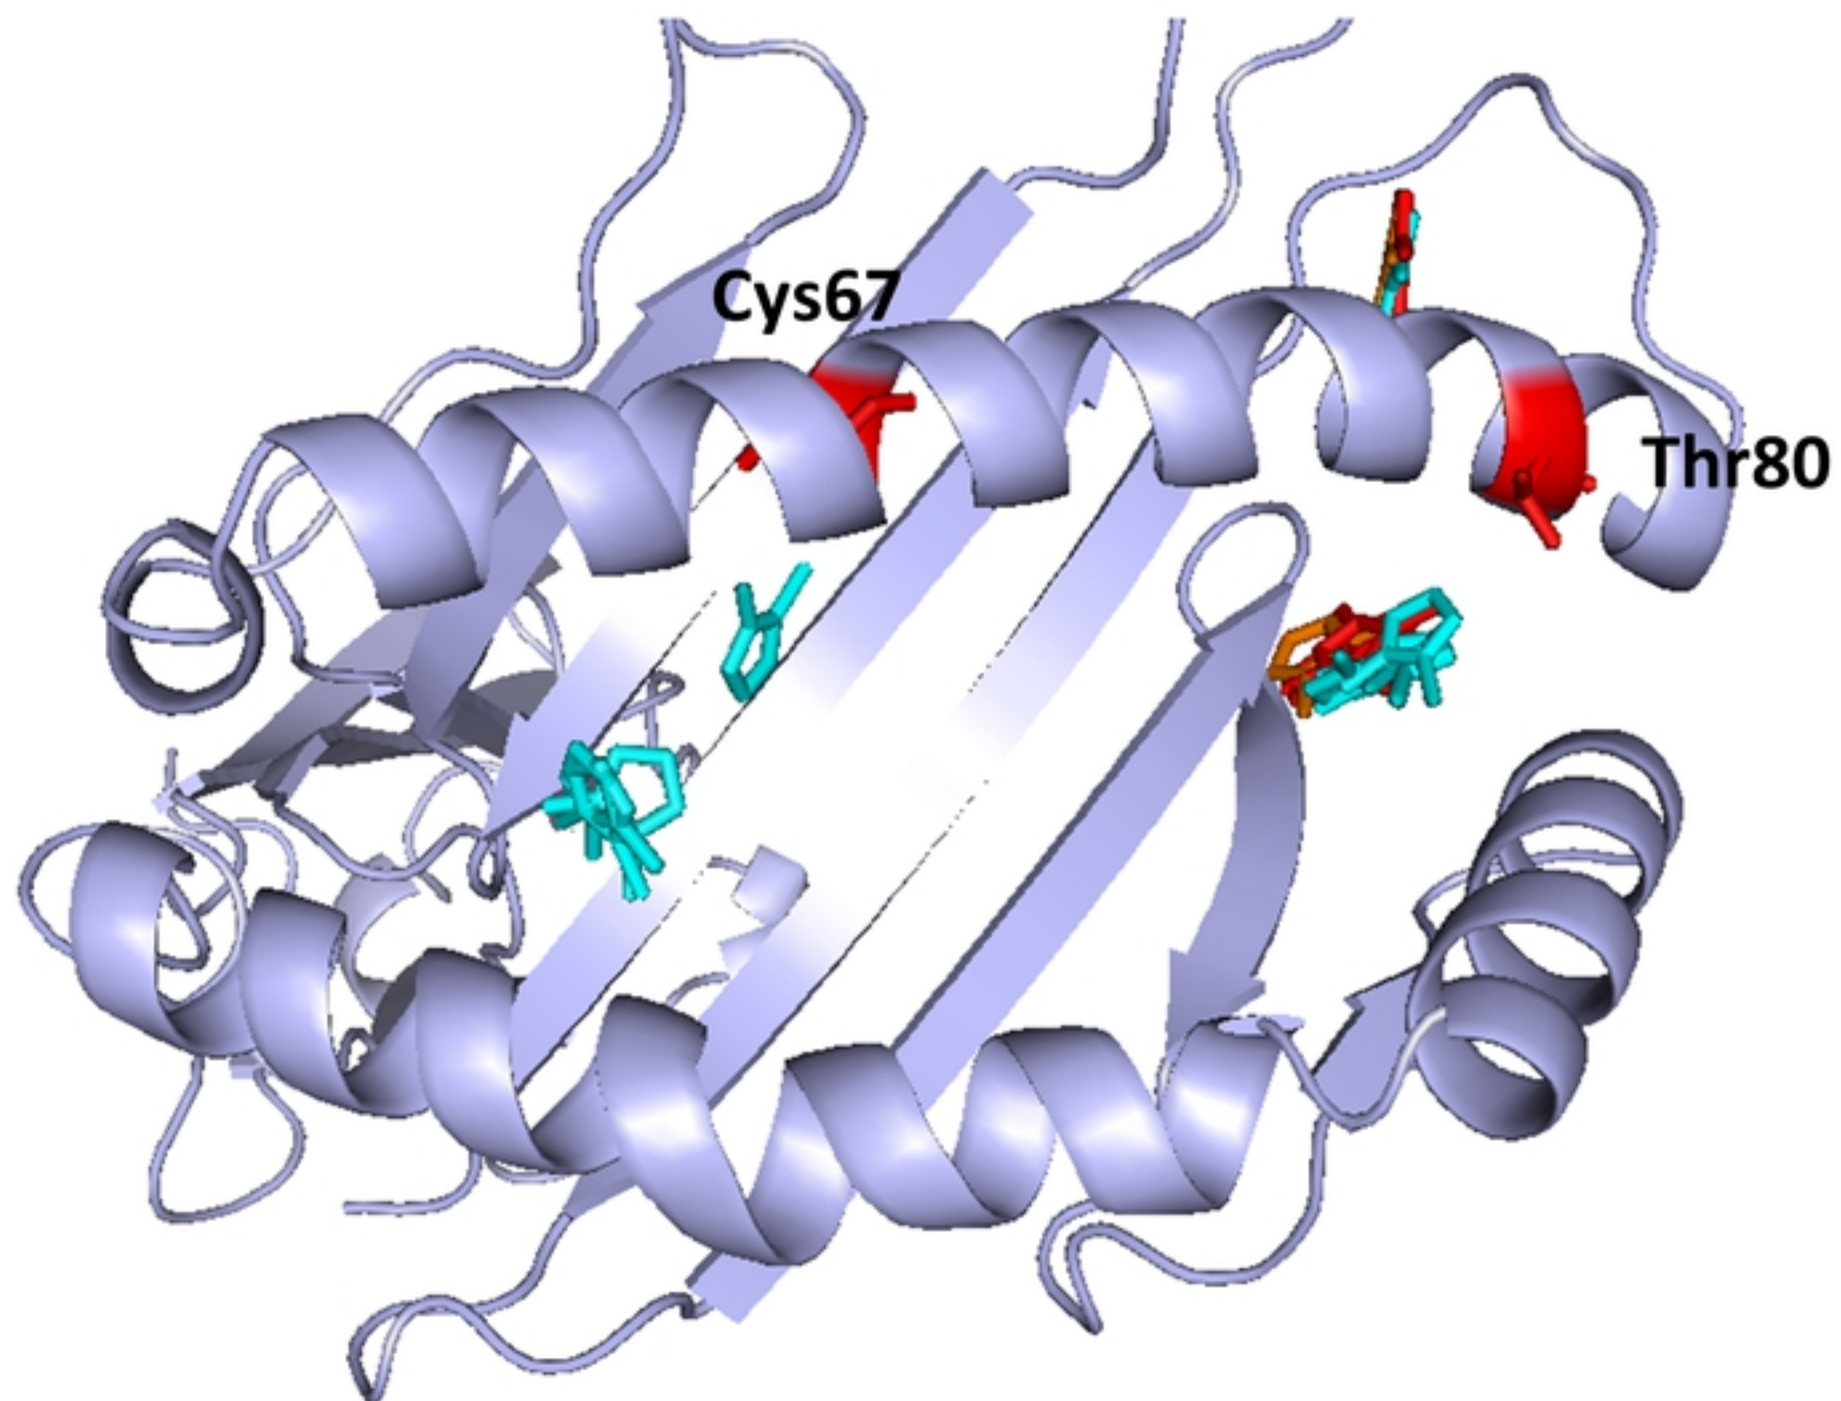

Fig3

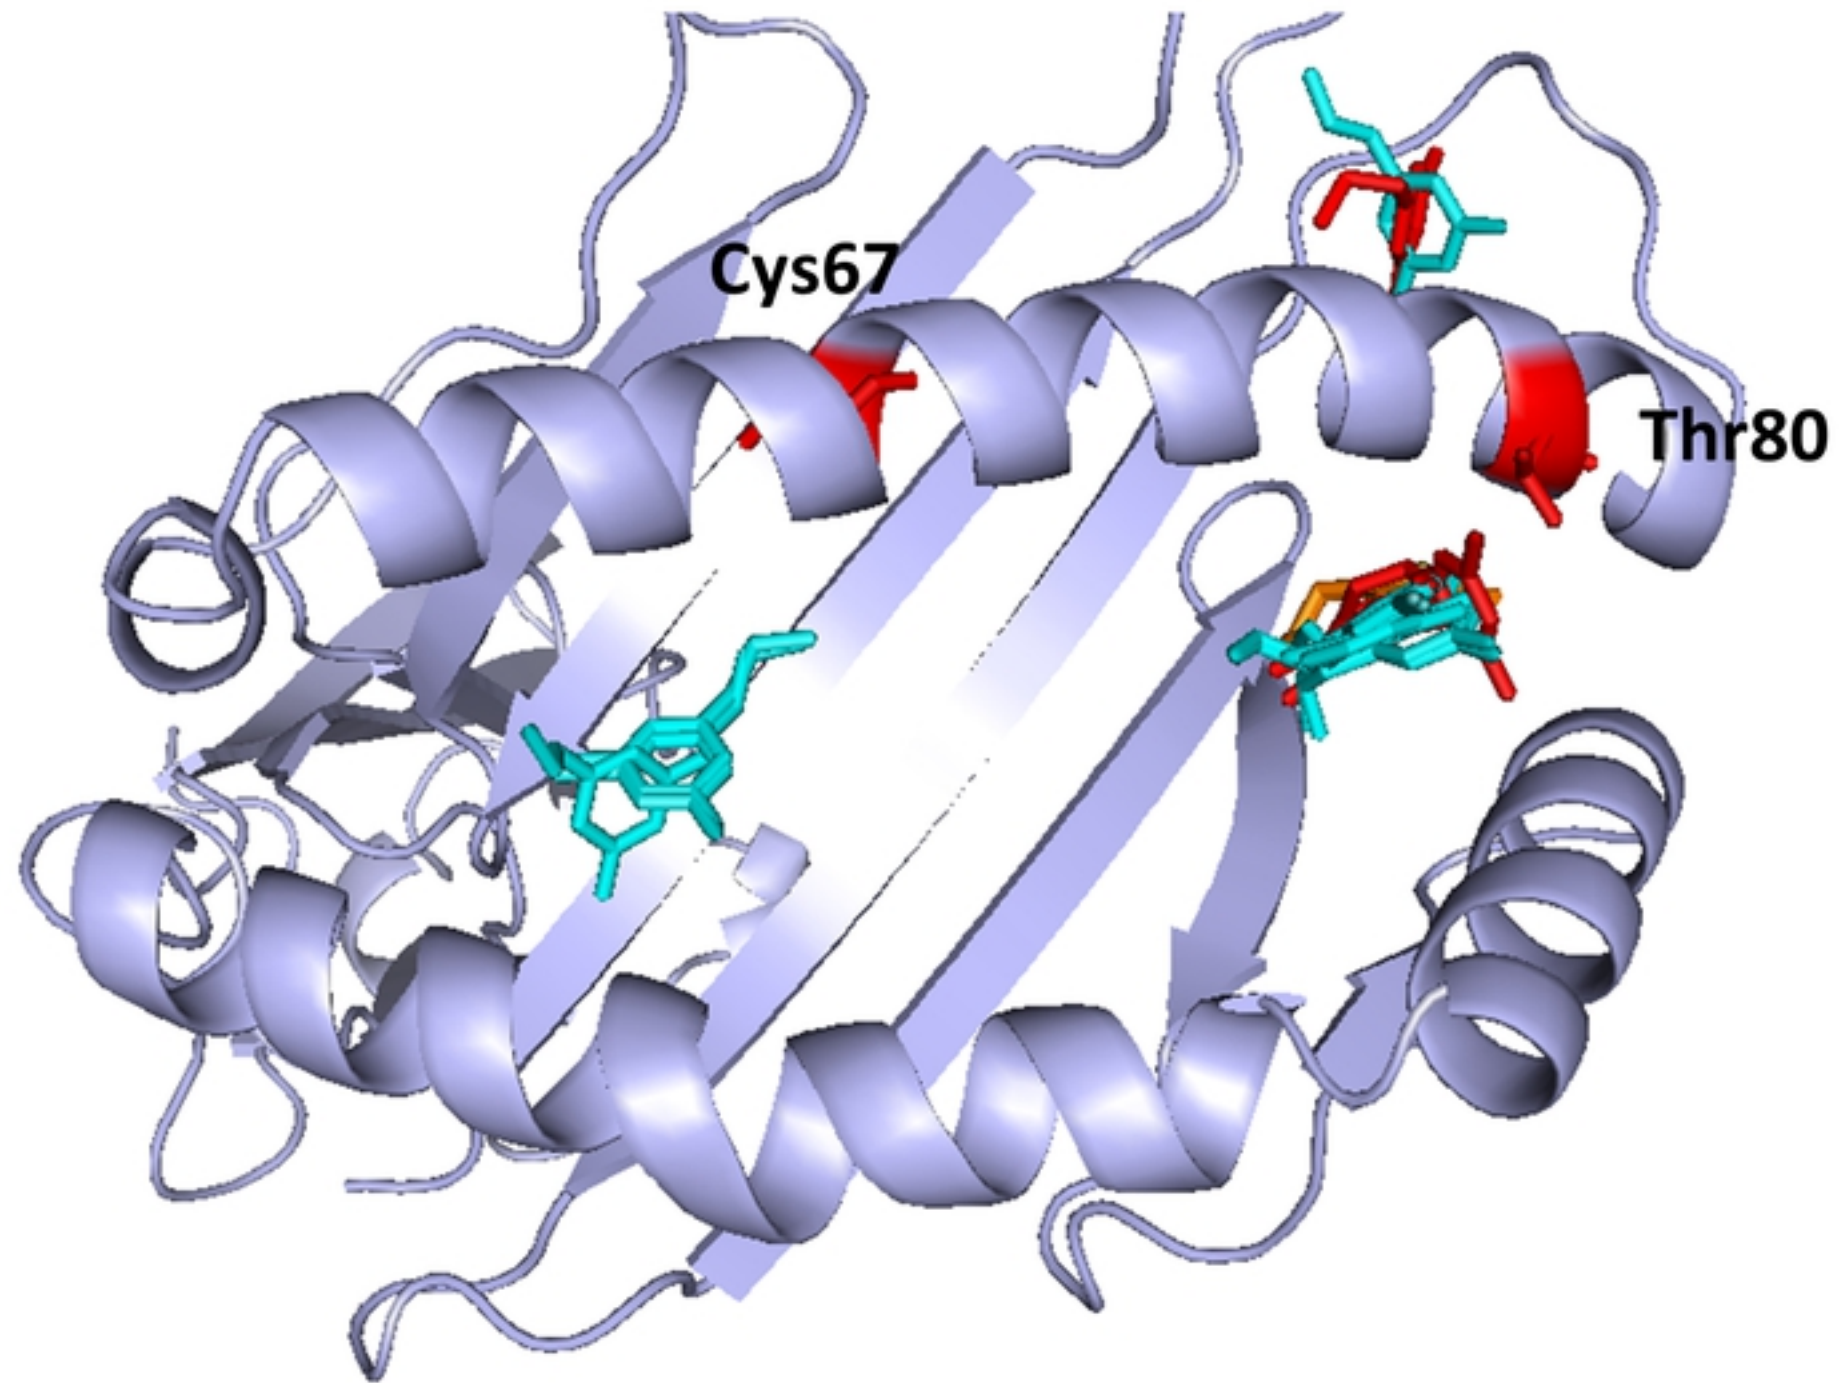

Fig4



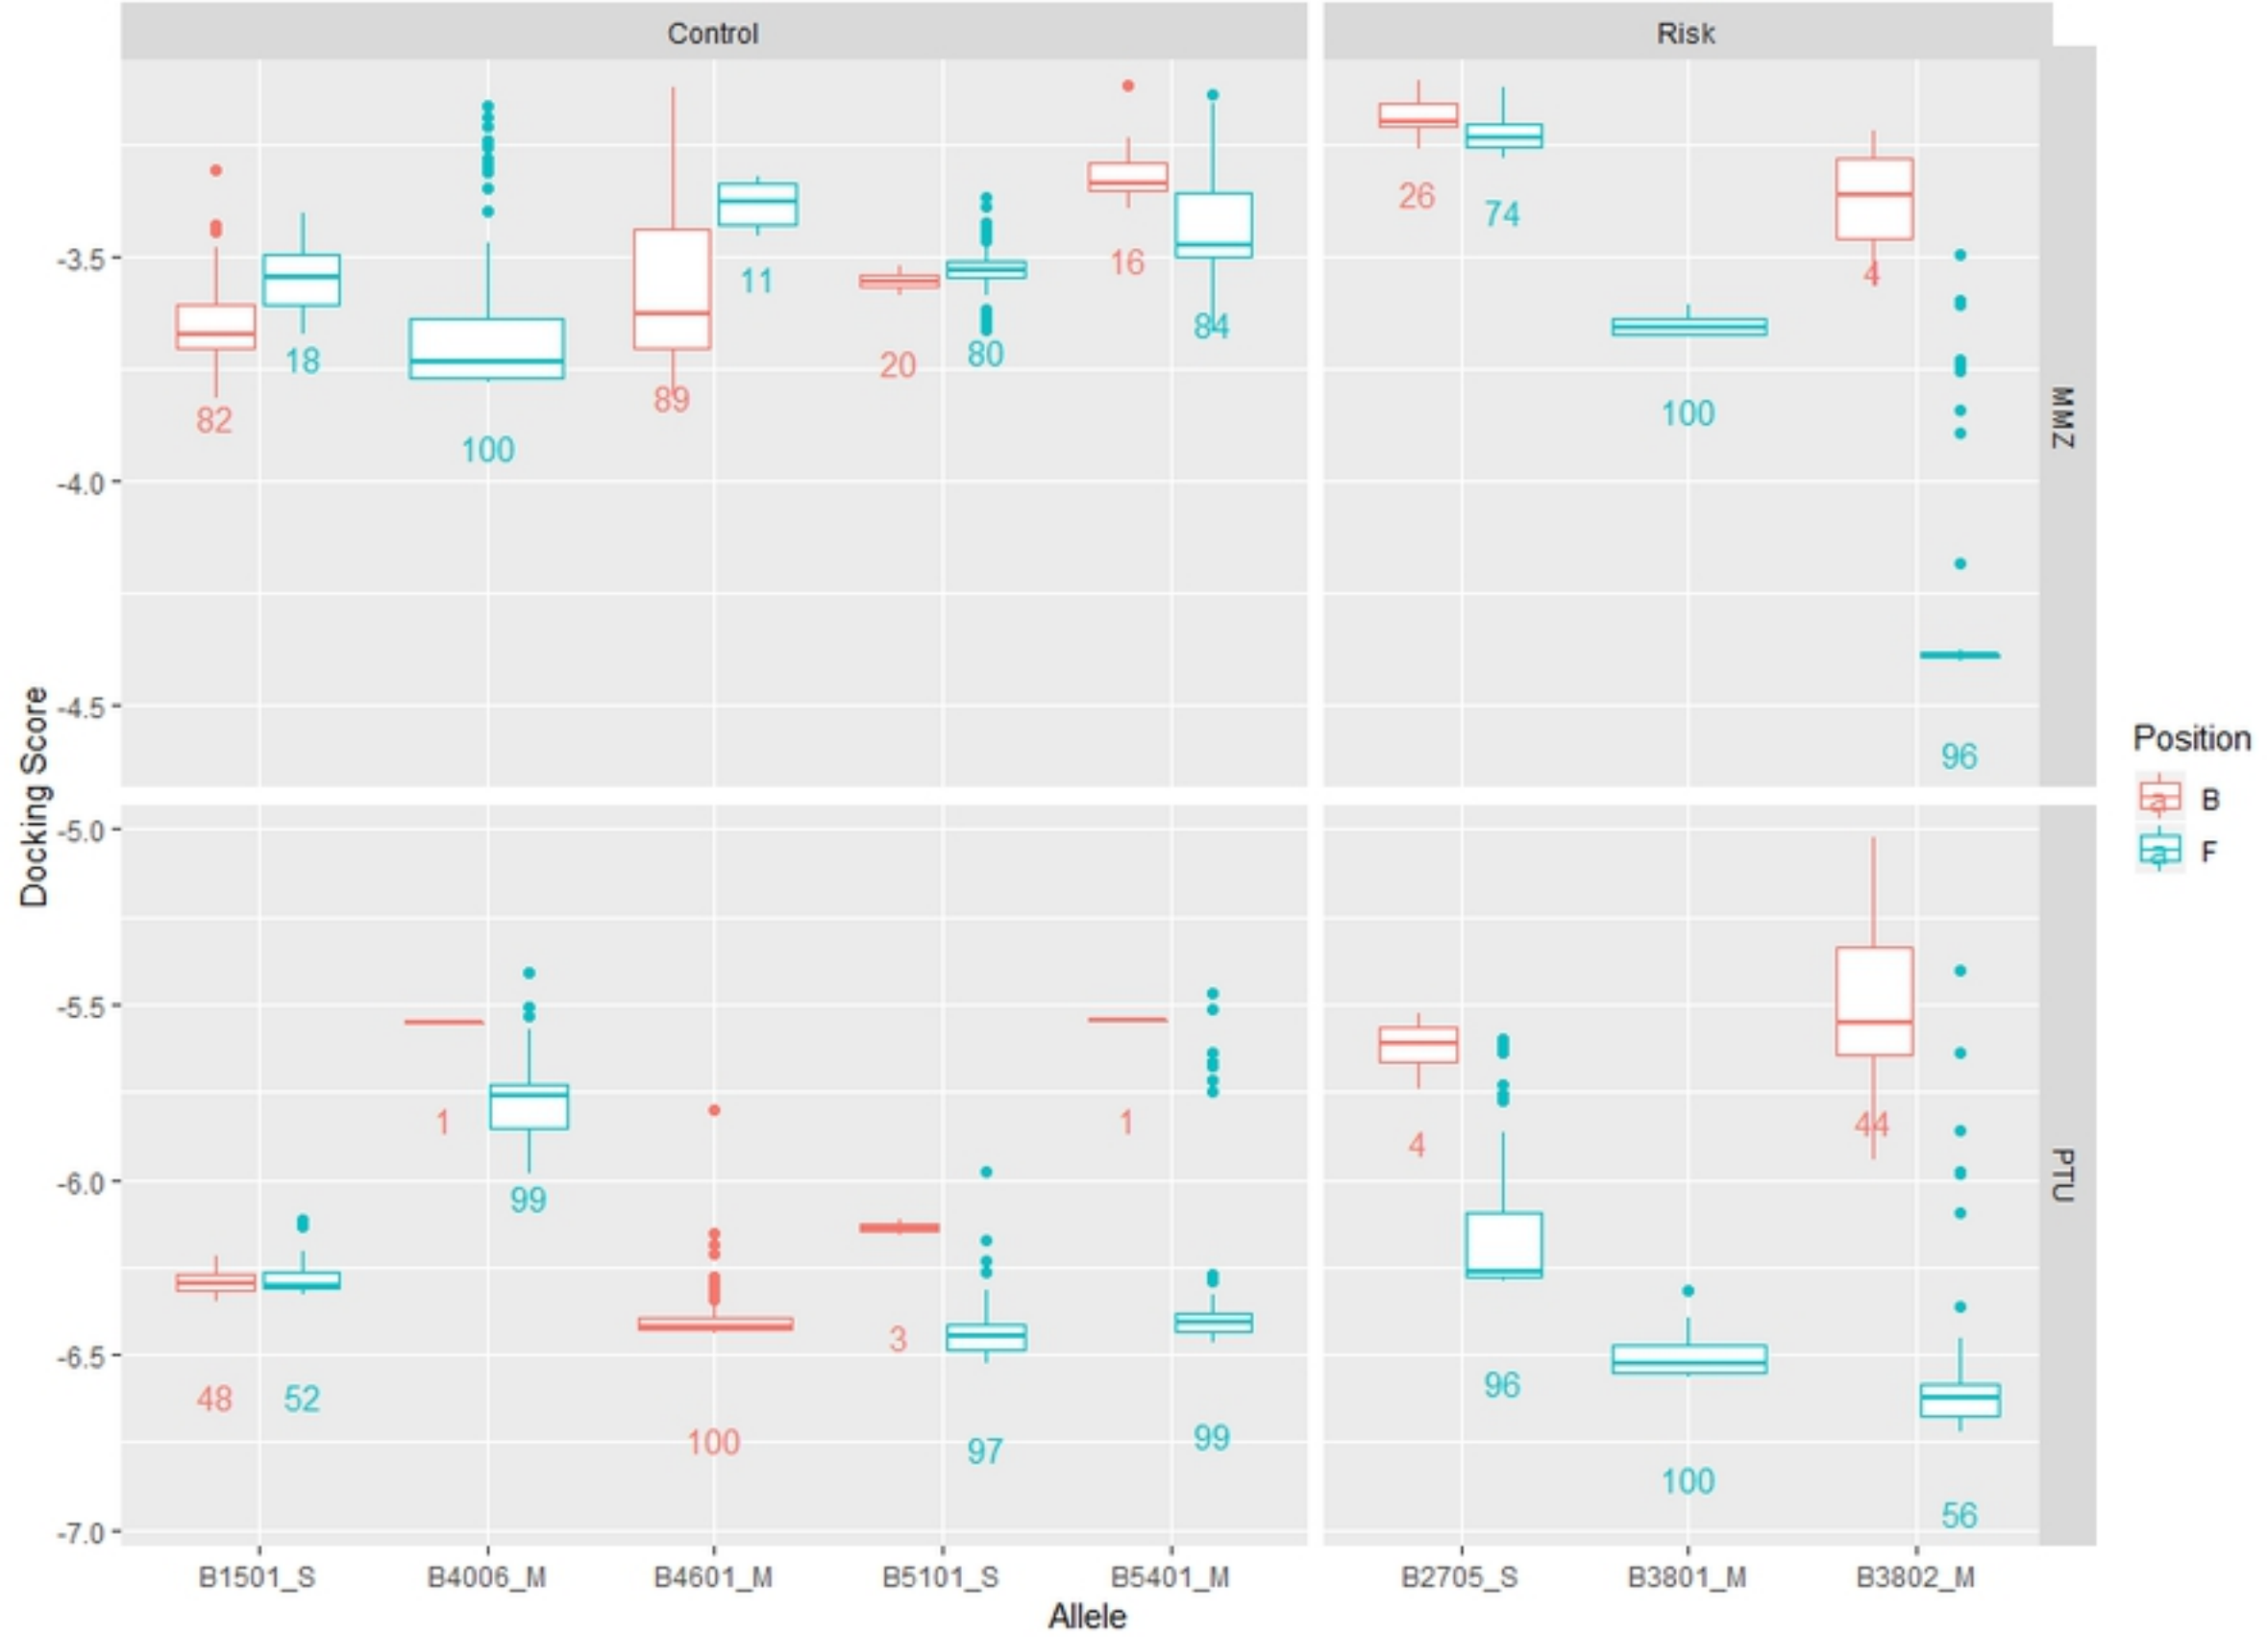

Fig5

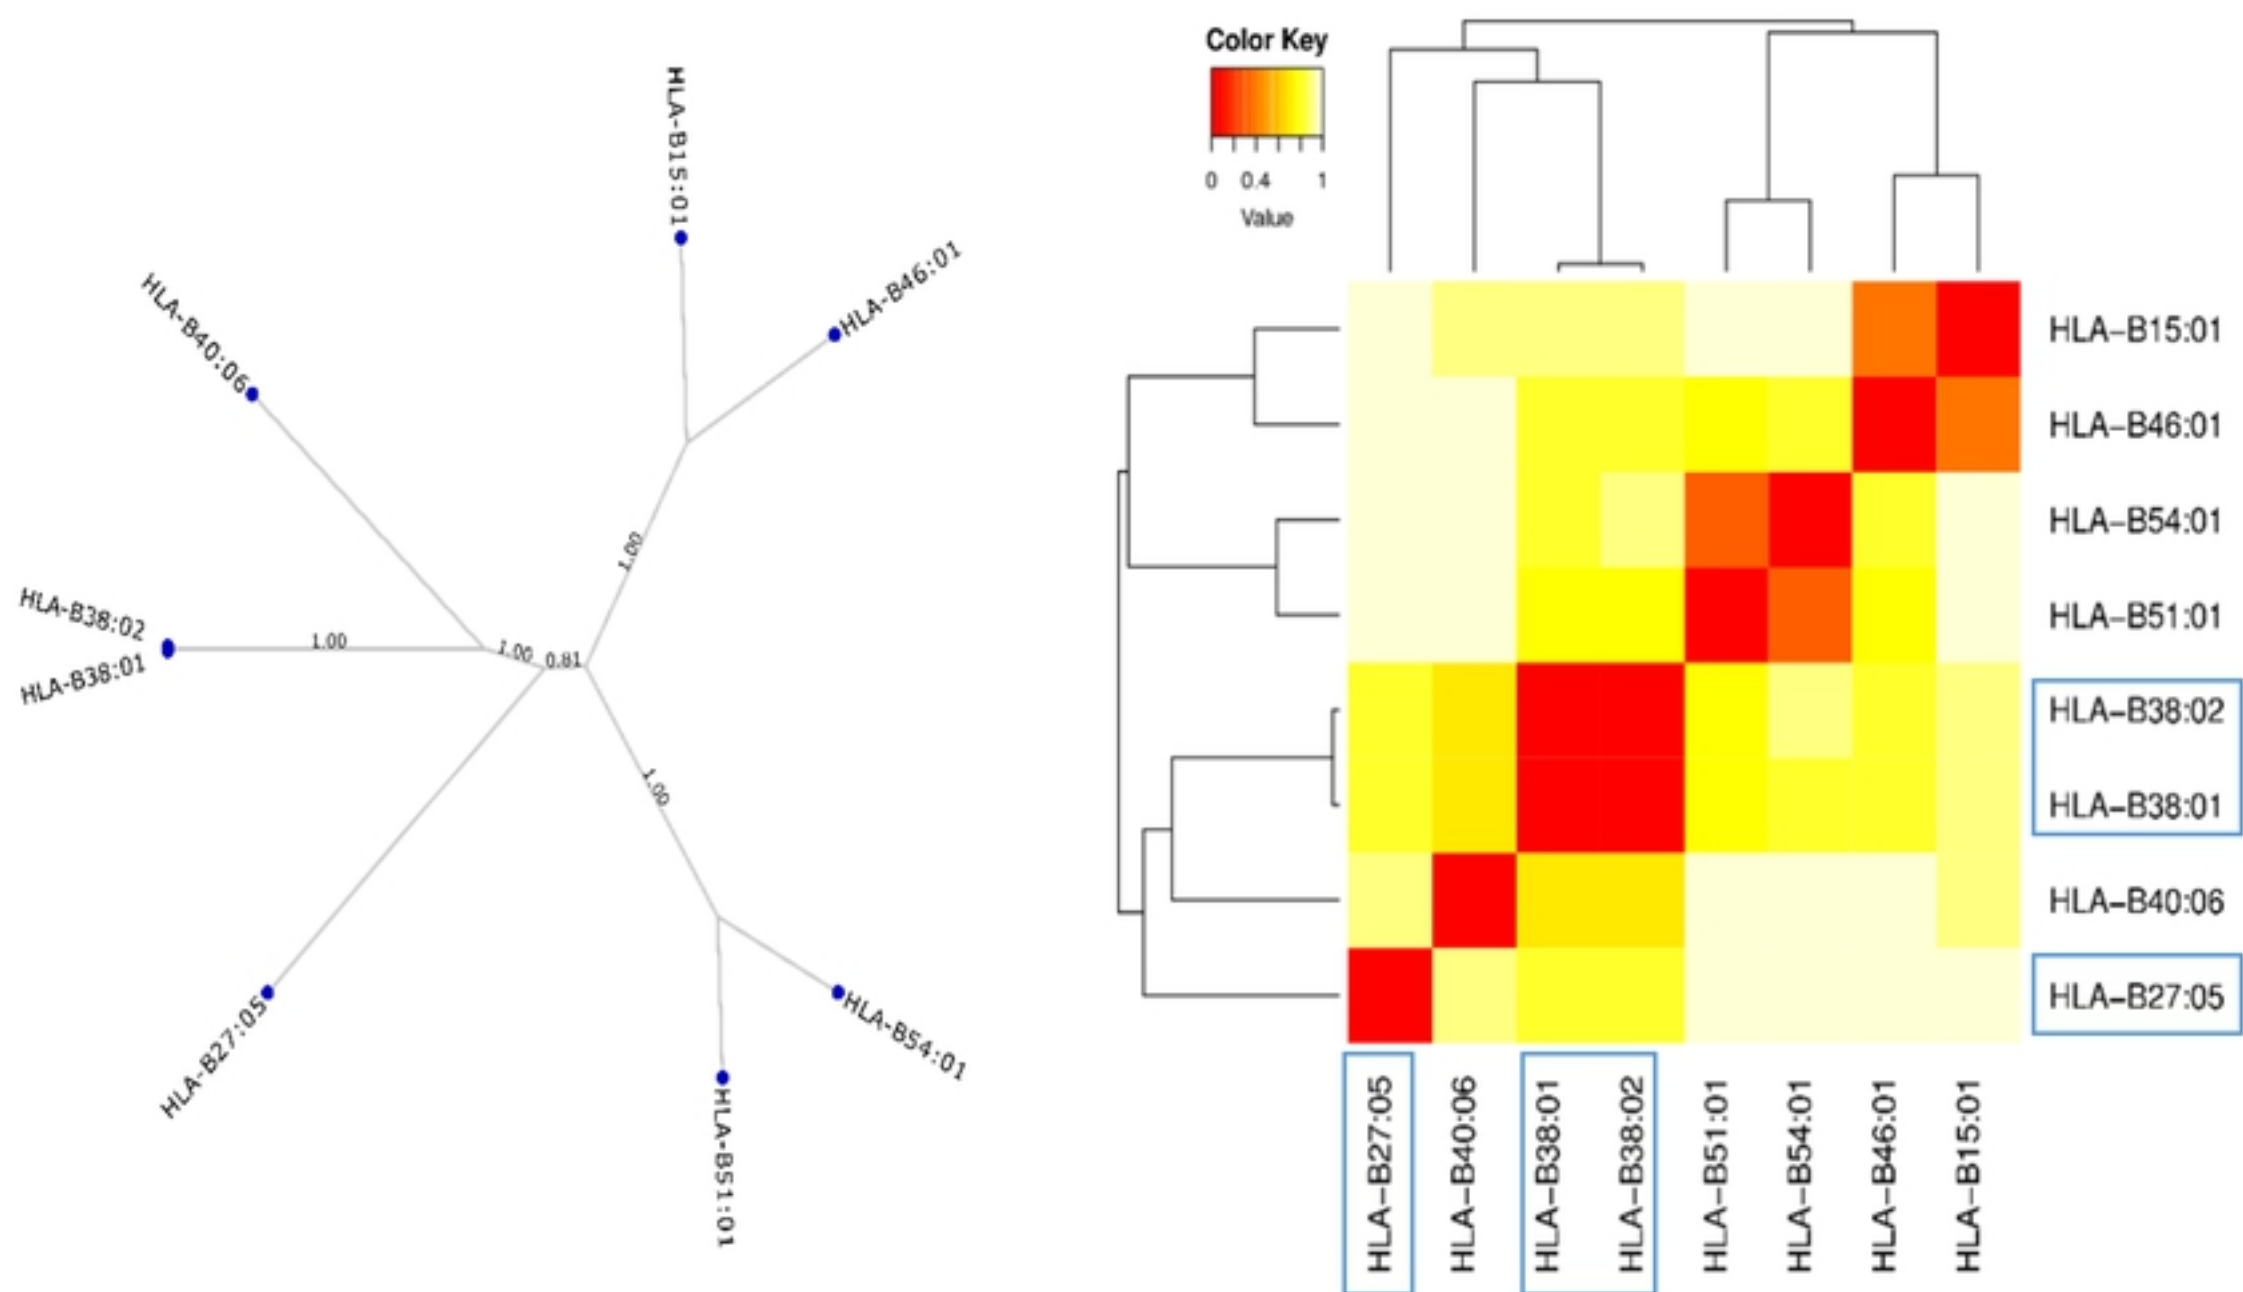

Fig1

a)

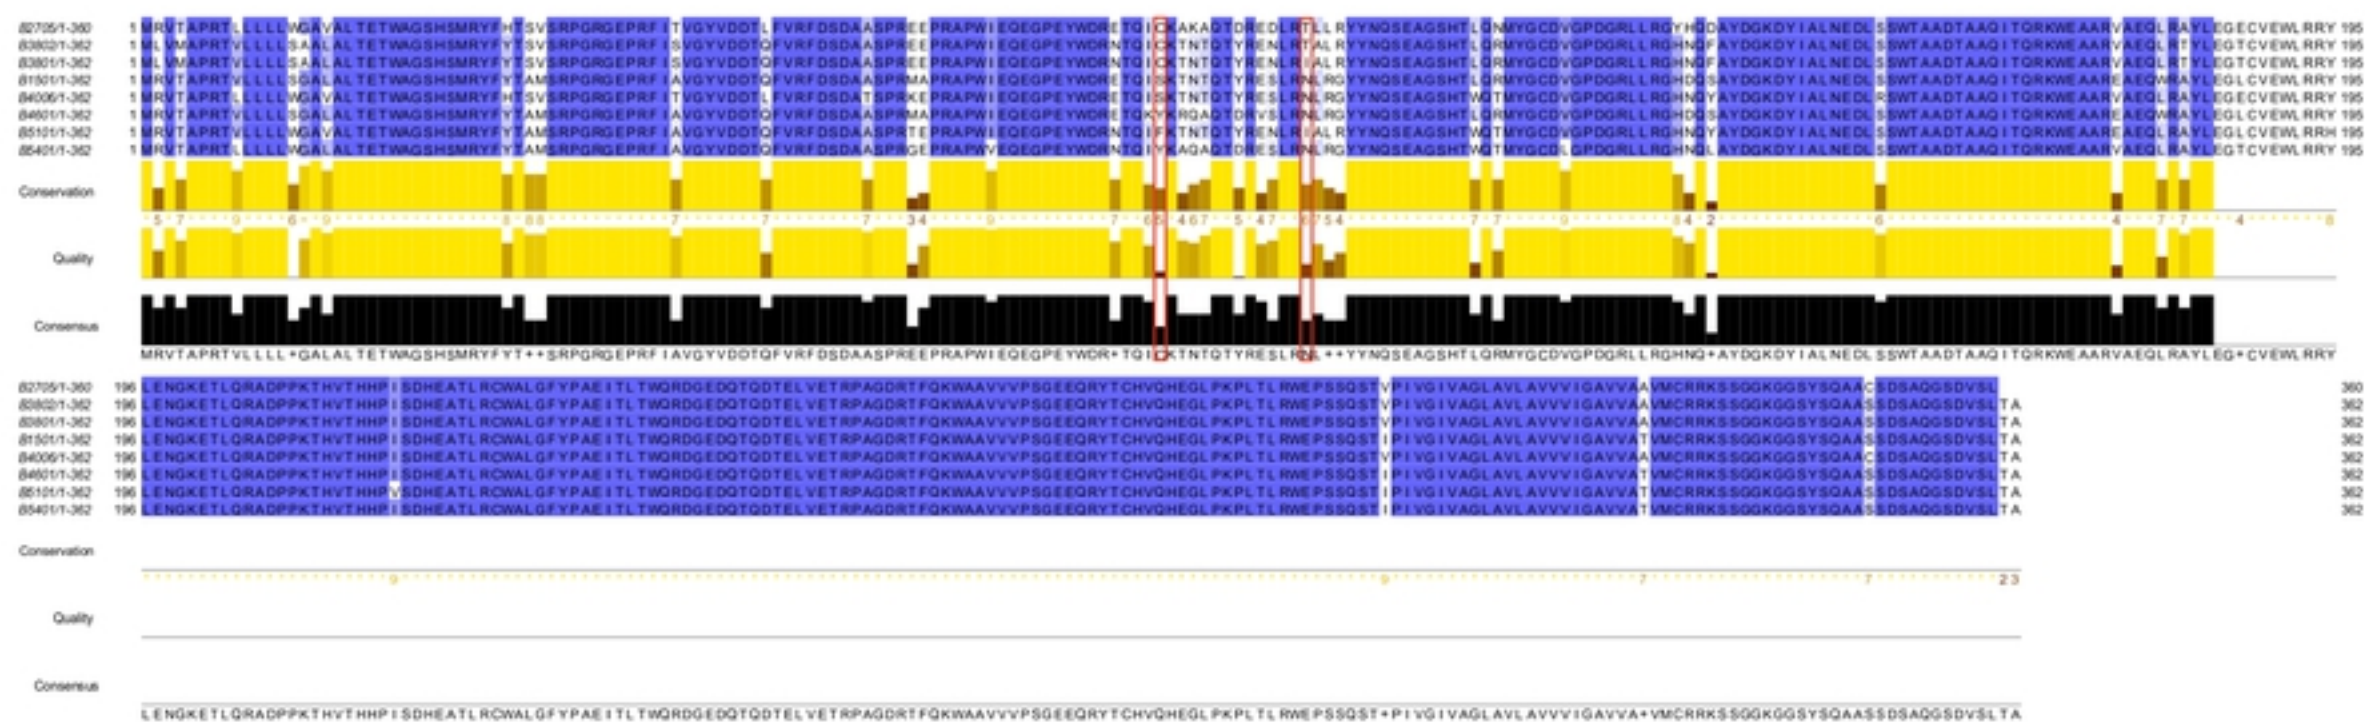

b)

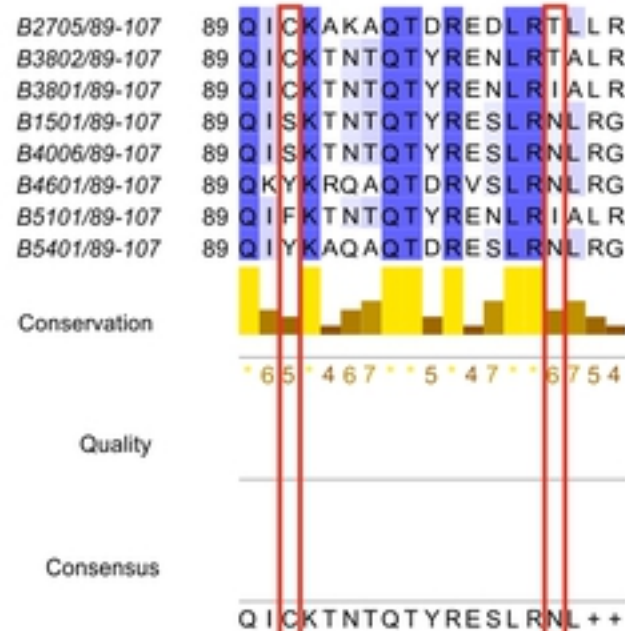

Source: http://biorxiv.org/content/10.1101/713743v1.full.pdf
